# Supplementary material
Source: PubMed Central journal article supplement (PMC5753402)
Supplement: NIHMS926919-supplement-supplement_1.pdf [file NIHMS926919-supplement-supplement_1.pdf]

Supplementary Table 1: Bivariate mixed models showing associations between peak oxygen consumption (VO<sub>2peak</sub>) and log plasma concentrations of sphingolipids associated with change in cognitive performance over 6 months of cardiac rehabilitation (CR) in patients with coronary artery disease (CAD)

| Sphingolipid species    | Lipid | Month                  |              |             | <i>b</i> | p-value<br>(p≤0.05)* |
|-------------------------|-------|------------------------|--------------|-------------|----------|----------------------|
|                         |       | 0<br>(n=120)           | 3<br>(n=103) | 6<br>(n=99) |          |                      |
| Sphingomyelin           | C16:0 | 5.81±0.07 <sup>1</sup> | 5.82±0.08    | 5.83±0.07   | -0.0004  | 0.47                 |
|                         | C18:0 | 5.09±0.10              | 5.10±0.12    | 5.11±0.10   | -0.003   | 0.005*               |
|                         | C18:1 | 4.69±0.11              | 4.70±0.11    | 4.70±0.11   | -0.003   | <0.001*              |
|                         | C20:1 | 4.55±0.11              | 4.56±0.12    | 4.56±0.12   | -0.002   | 0.10                 |
|                         | C24:1 | 5.78±0.10              | 5.79±0.09    | 5.80±0.10   | 0.0004   | 0.62                 |
| Dihydrosphingomyelin    | C16:0 | 4.34±0.15              | 4.35±0.14    | 4.38±0.11   | -0.001   | 0.38                 |
|                         | C18:0 | 5.12±0.09              | 5.13±0.09    | 5.14±0.09   | 0.0002   | 0.79                 |
|                         | C20:0 | 5.28±0.11              | 5.28±0.11    | 5.30±0.10   | -0.0002  | 0.80                 |
|                         | C22:0 | 4.40±0.12              | 4.41±0.12    | 4.43±0.11   | -0.0004  | 0.67                 |
| Ceramide                | C16:0 | 1.28±0.14              | 1.26±0.15    | 1.27±0.15   | -0.004   | 0.008*               |
|                         | C18:0 | 0.84±0.25              | 0.82±0.26    | 0.82±0.26   | -0.006   | 0.005*               |
|                         | C20:0 | 1.93±0.21              | 1.92±0.17    | 1.93±0.17   | -0.002   | 0.28                 |
|                         | C22:0 | 2.47±0.25              | 2.49±0.23    | 2.51±0.26   | -0.002   | 0.92                 |
|                         | C24:1 | 1.85±0.43              | 1.79±0.41    | 1.79±0.40   | -0.01    | 0.004*               |
| Monohexylceramide       | C18:0 | 0.90±0.20              | 0.88±0.20    | 0.90±0.18   | -0.004   | 0.02*                |
|                         | C26:1 | 0.34±0.42              | 0.32±0.53    | 0.37±0.49   | 0.007    | 0.09                 |
| Lactosylceramide        | C18:1 | 1.12±0.14              | 1.11±0.18    | 1.14±0.18   | 0.003    | 0.06                 |
|                         | C24:1 | 2.14±0.18              | 2.15±0.18    | 2.16±0.20   | 0.002    | 0.17                 |
| Sphingosine             | SPH   | 0.12±0.35              | 0.12±0.40    | 0.12±0.33   | 0.002    | 0.54                 |
| Sphingosine-1-phosphate | S1P   | 1.13±0.35              | 1.14±0.34    | 1.12±0.34   | 0.003    | 0.70                 |

<sup>1</sup> values are mean±SD log sphingolipid concentrations
